# Supplementary material for: Diversity of A(H5N1) clade 2.3.2.1c avian influenza viruses with evidence of reassortment in Cambodia, 2014-2016
Source: PubMed Central journal article supplement (PMC6901219; doi:10.1371/journal.pone.0226108), 2019-12-09
Supplement: pone.0226108.s001.pdf [file pone.0226108.s001.pdf]

# S1a) HA

## Key

- 2014
- 2015
- 2016
- \* Poultry outbreak
- Human AIV

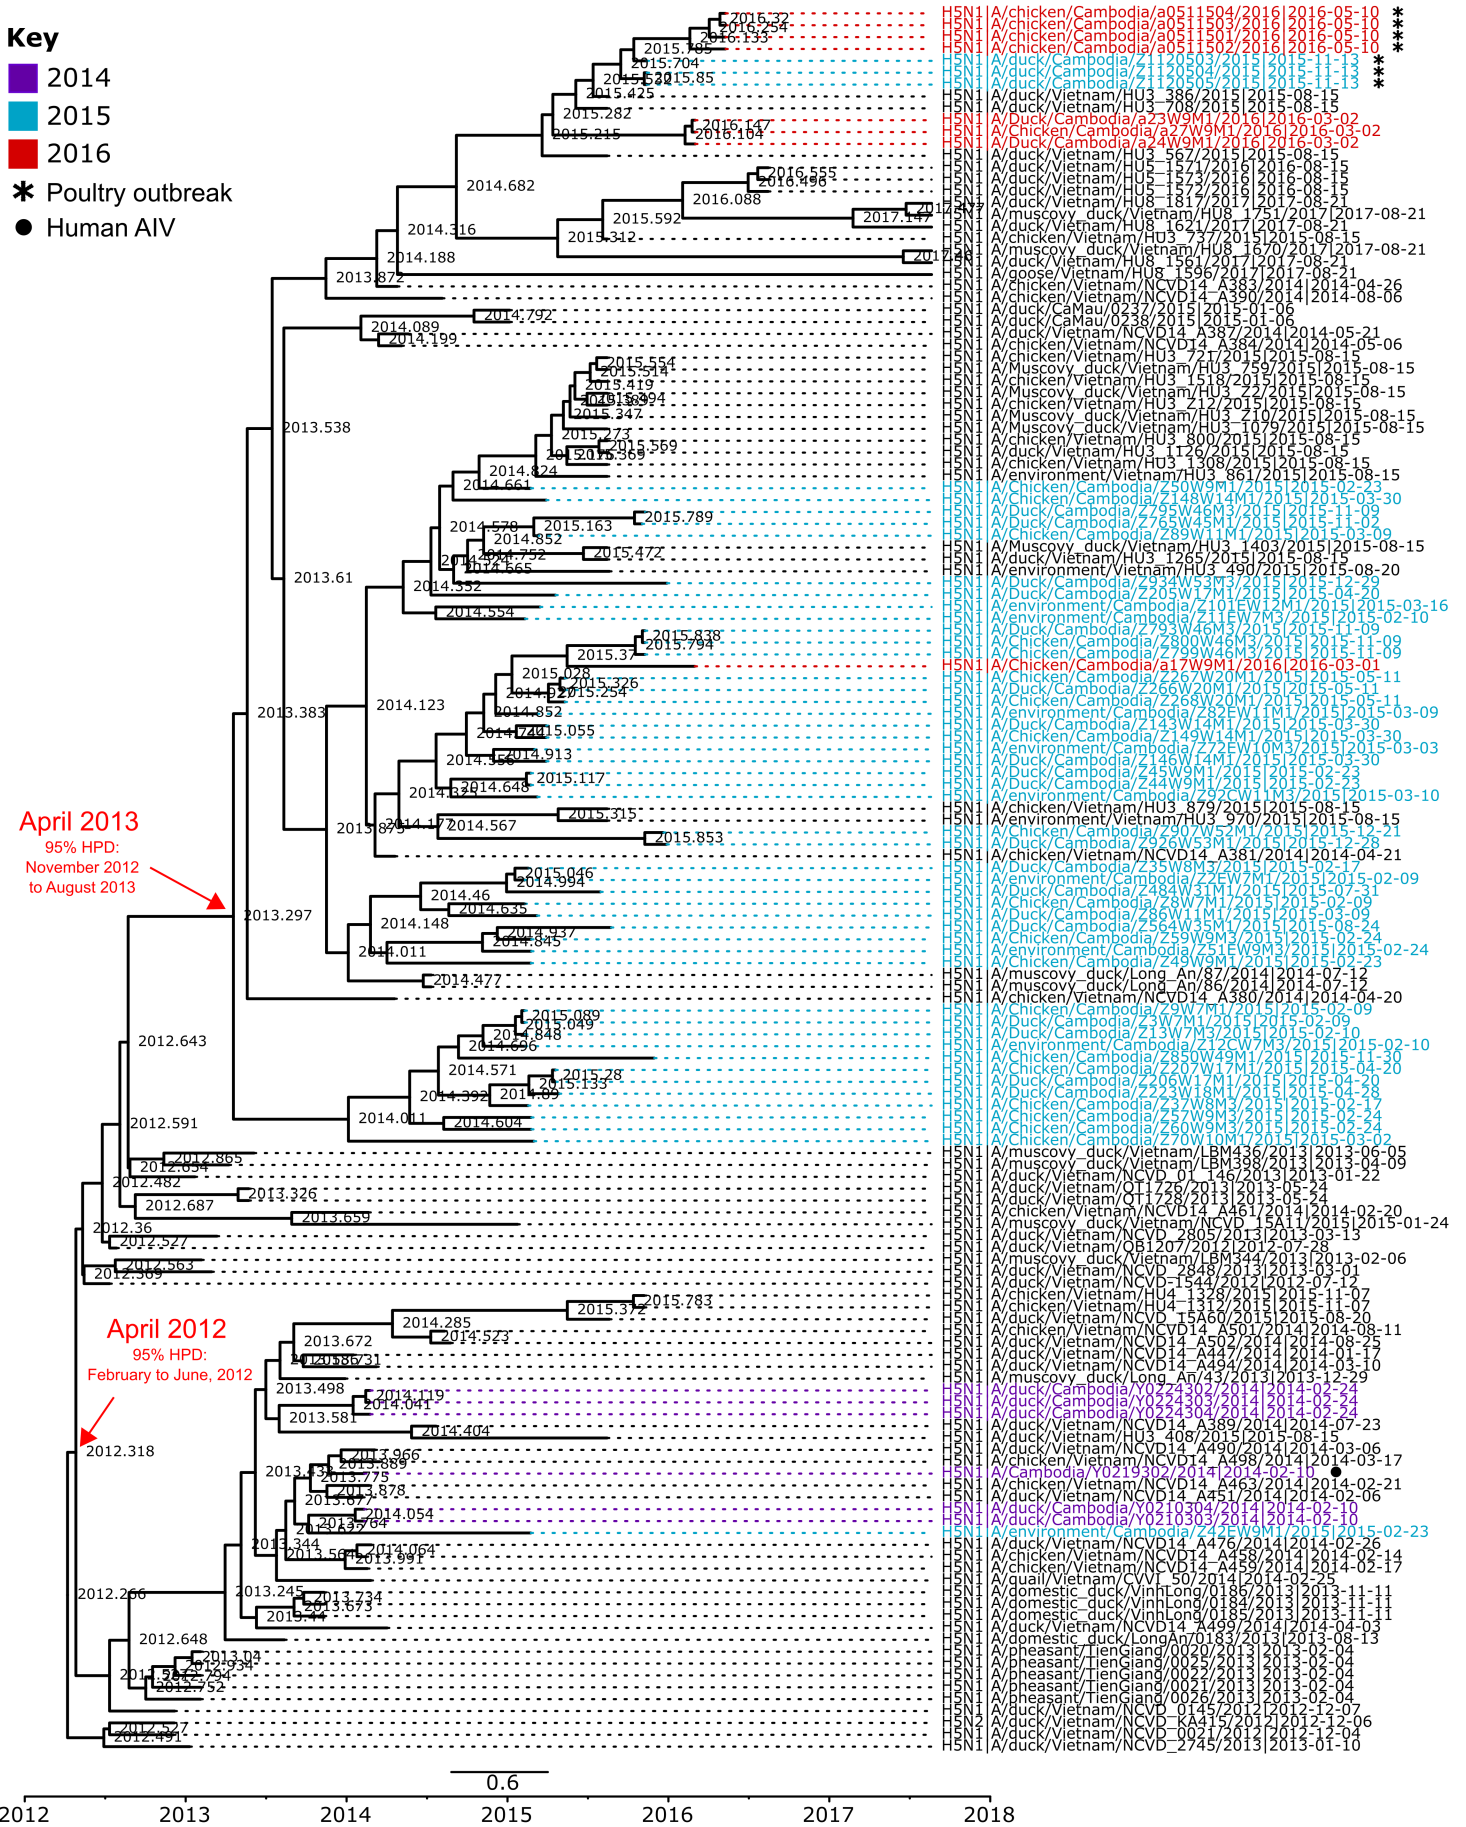

S1b) NA

Key

- 2014
- 2015
- 2016

\* Poultry outbreak

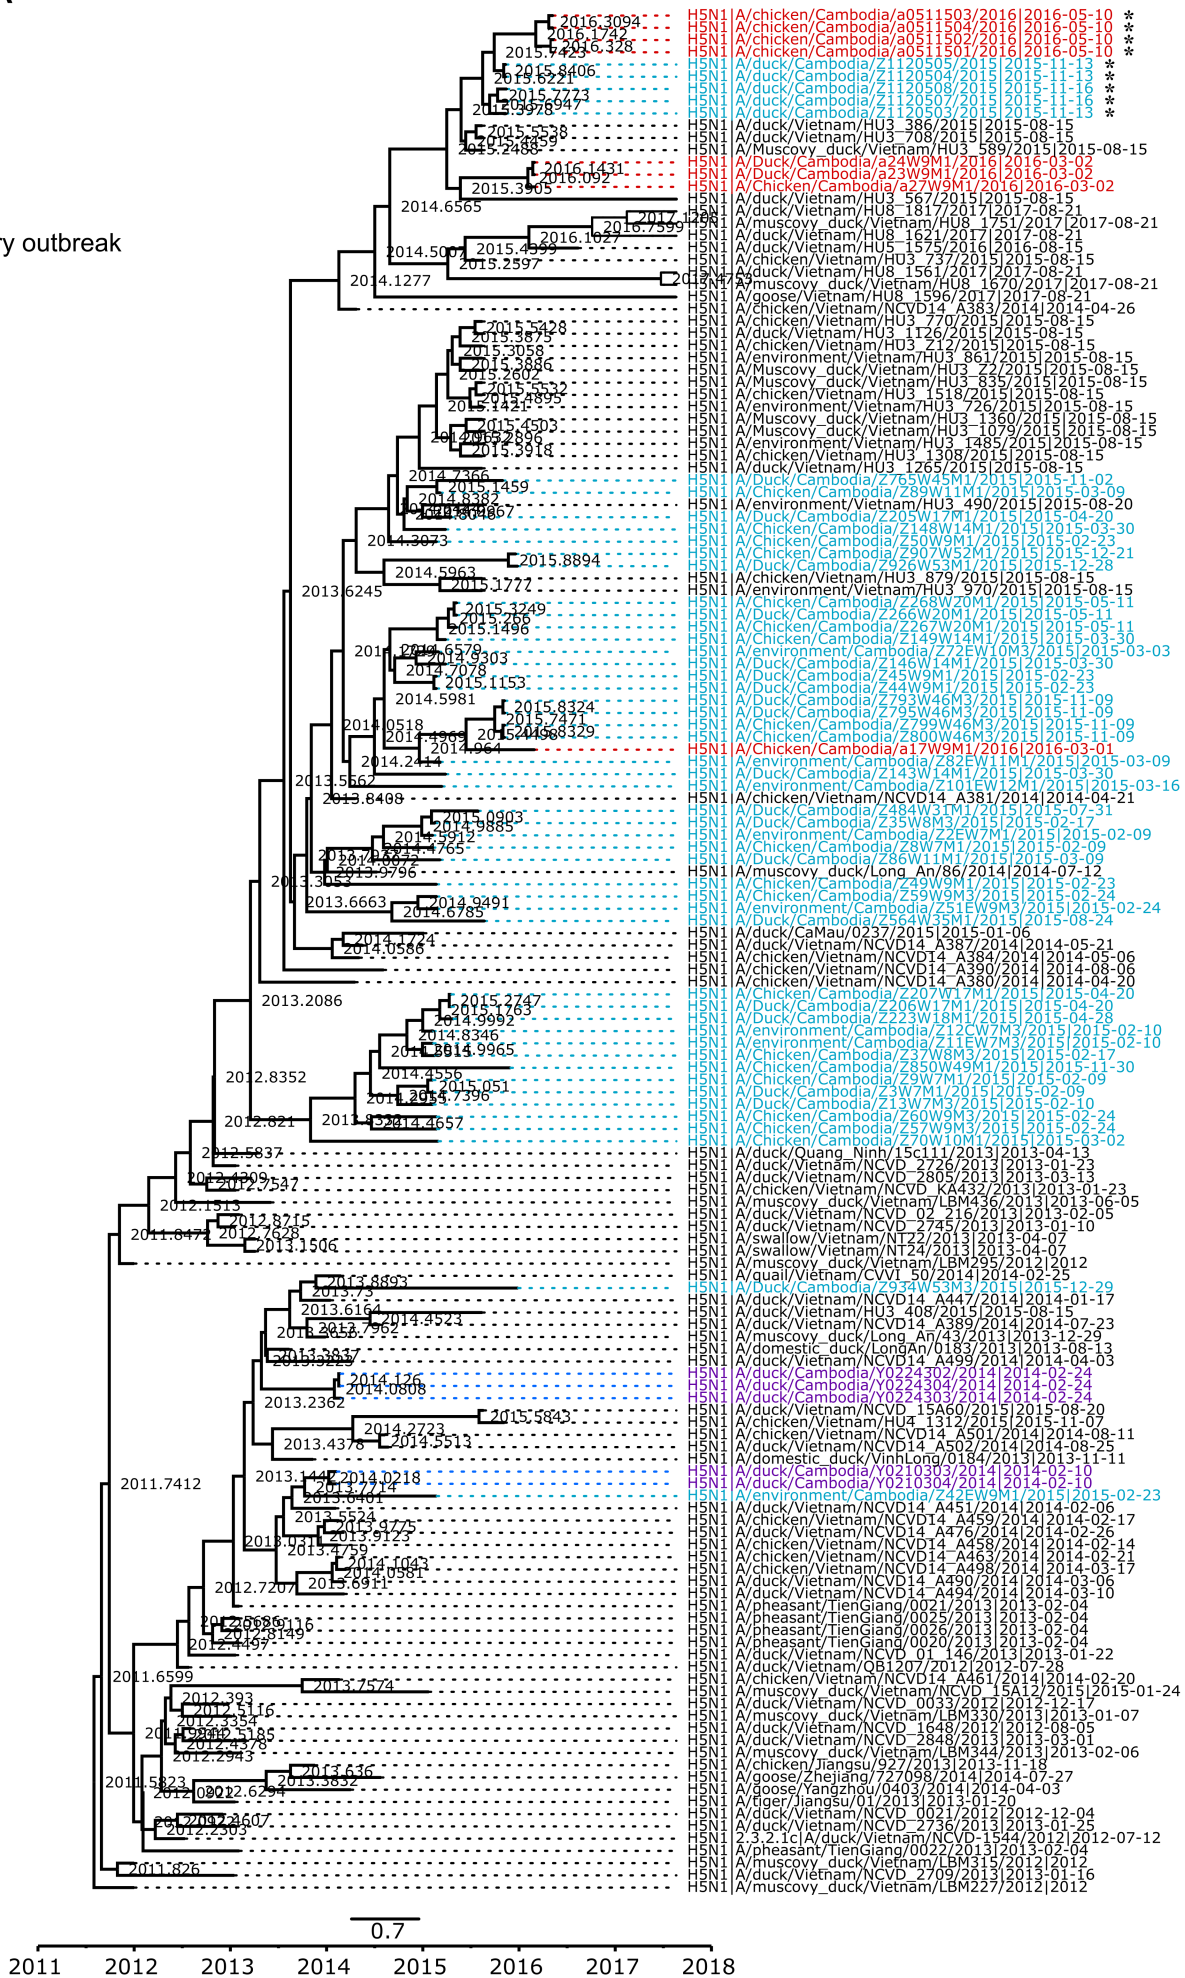

2011 2012 2013 2014 2015 2016 2017 2018
