# Supplementary material for: Diversity of A(H5N1) clade 2.3.2.1c avian influenza viruses with evidence of reassortment in Cambodia, 2014-2016
Source: PubMed Central journal article supplement (PMC6901219; doi:10.1371/journal.pone.0226108), 2019-12-09
Supplement: pone.0226108.s002.pdf [file pone.0226108.s002.pdf]

S2a) NA

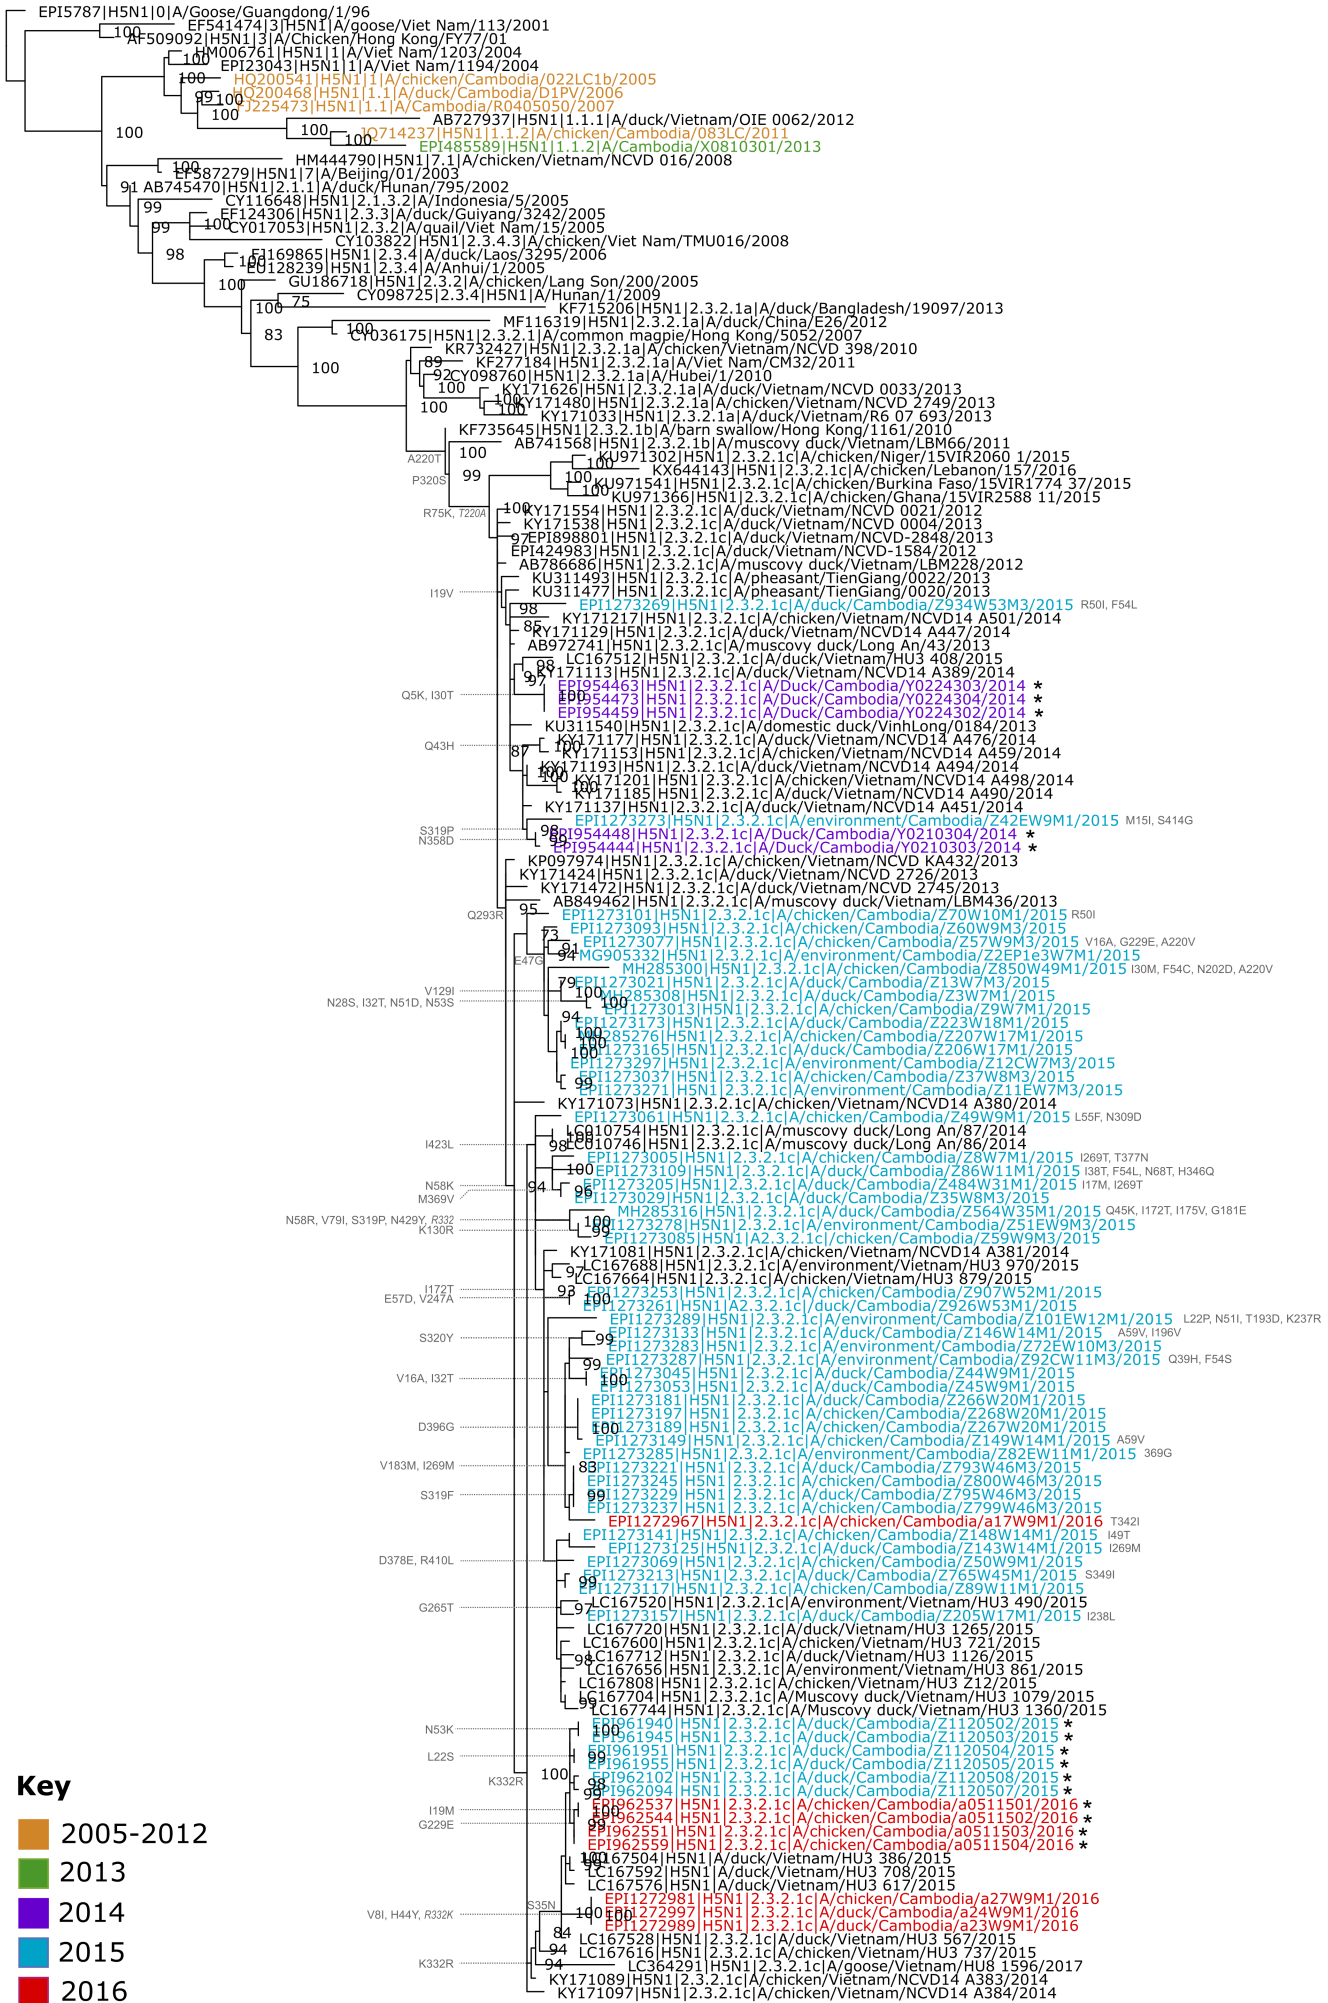

6B

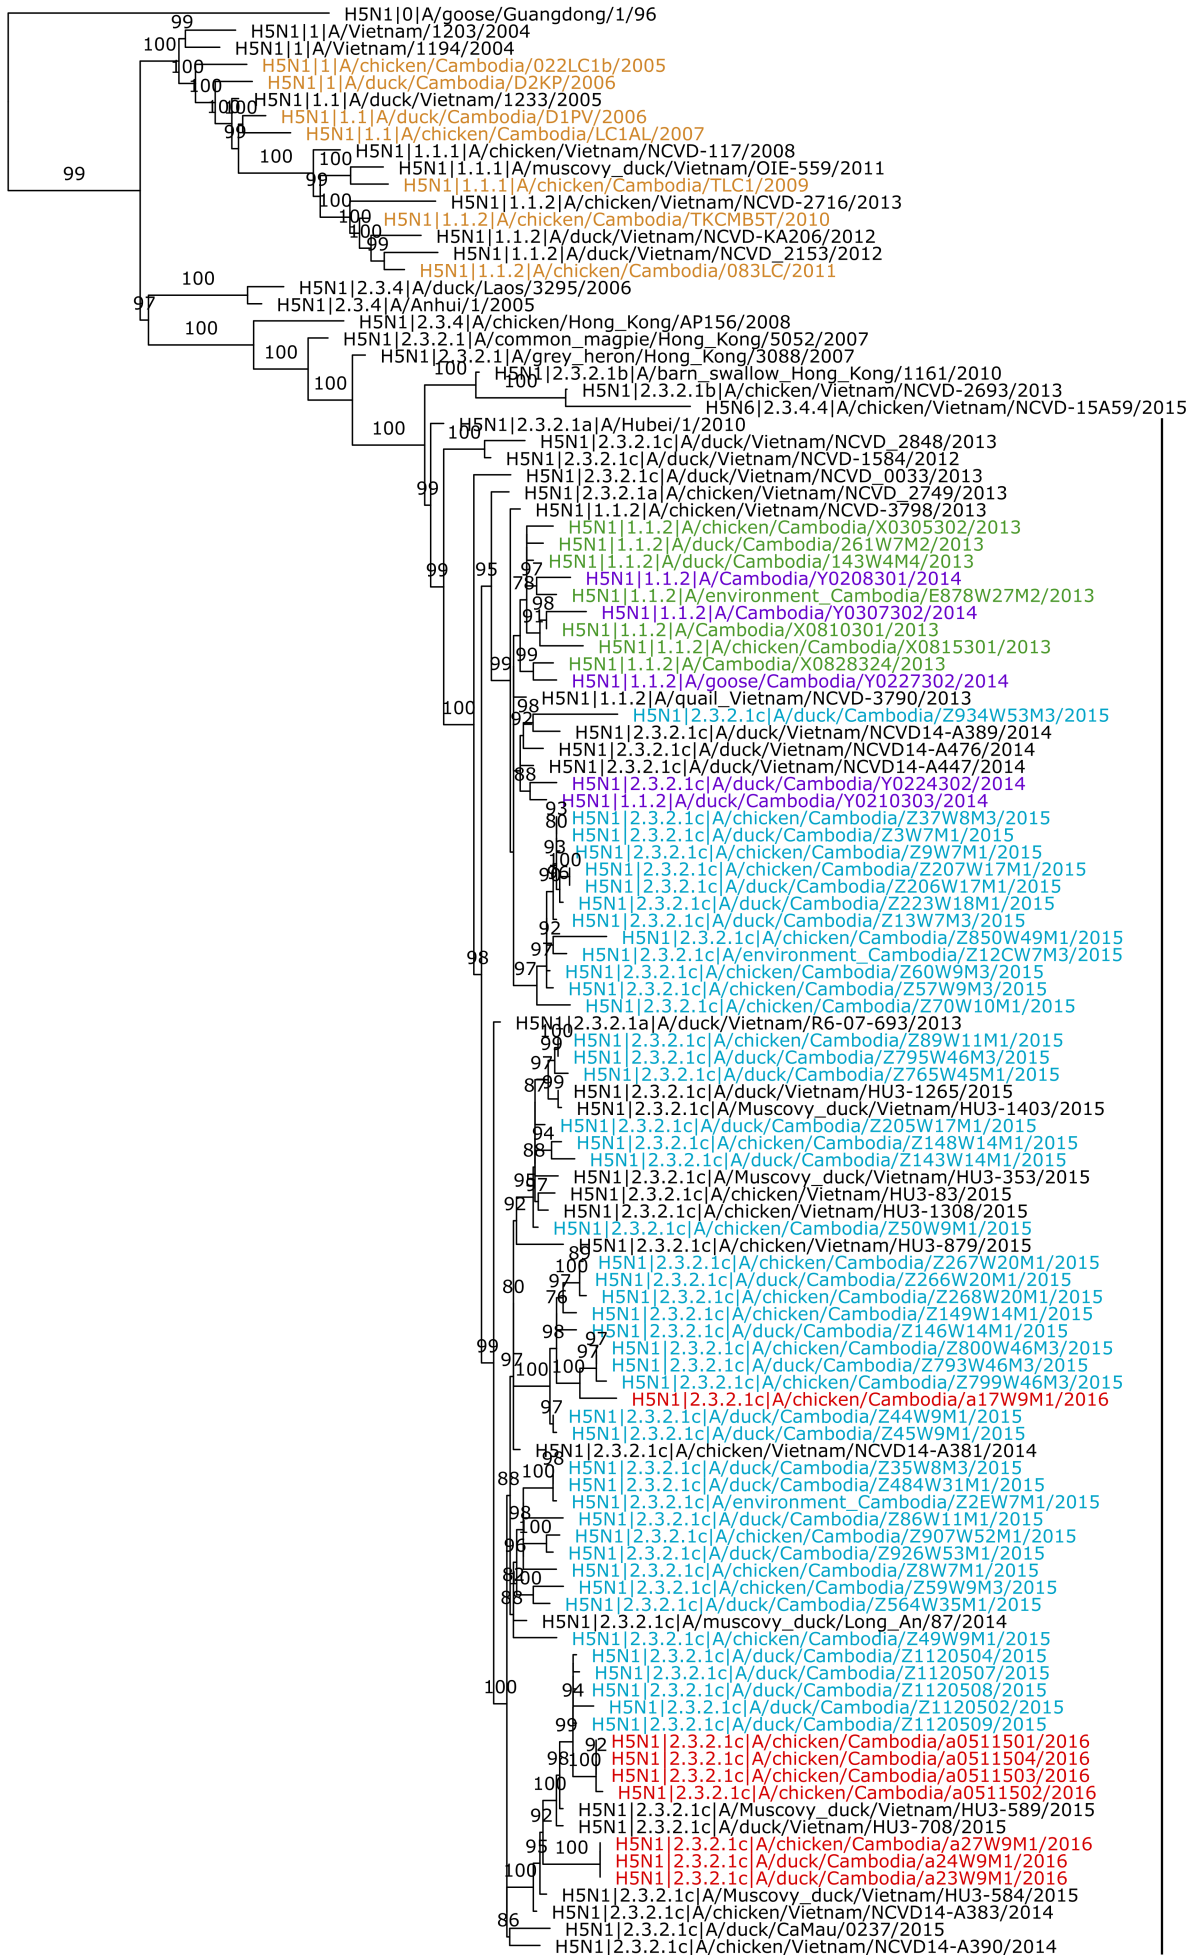

1A

S2c) PB1

Key

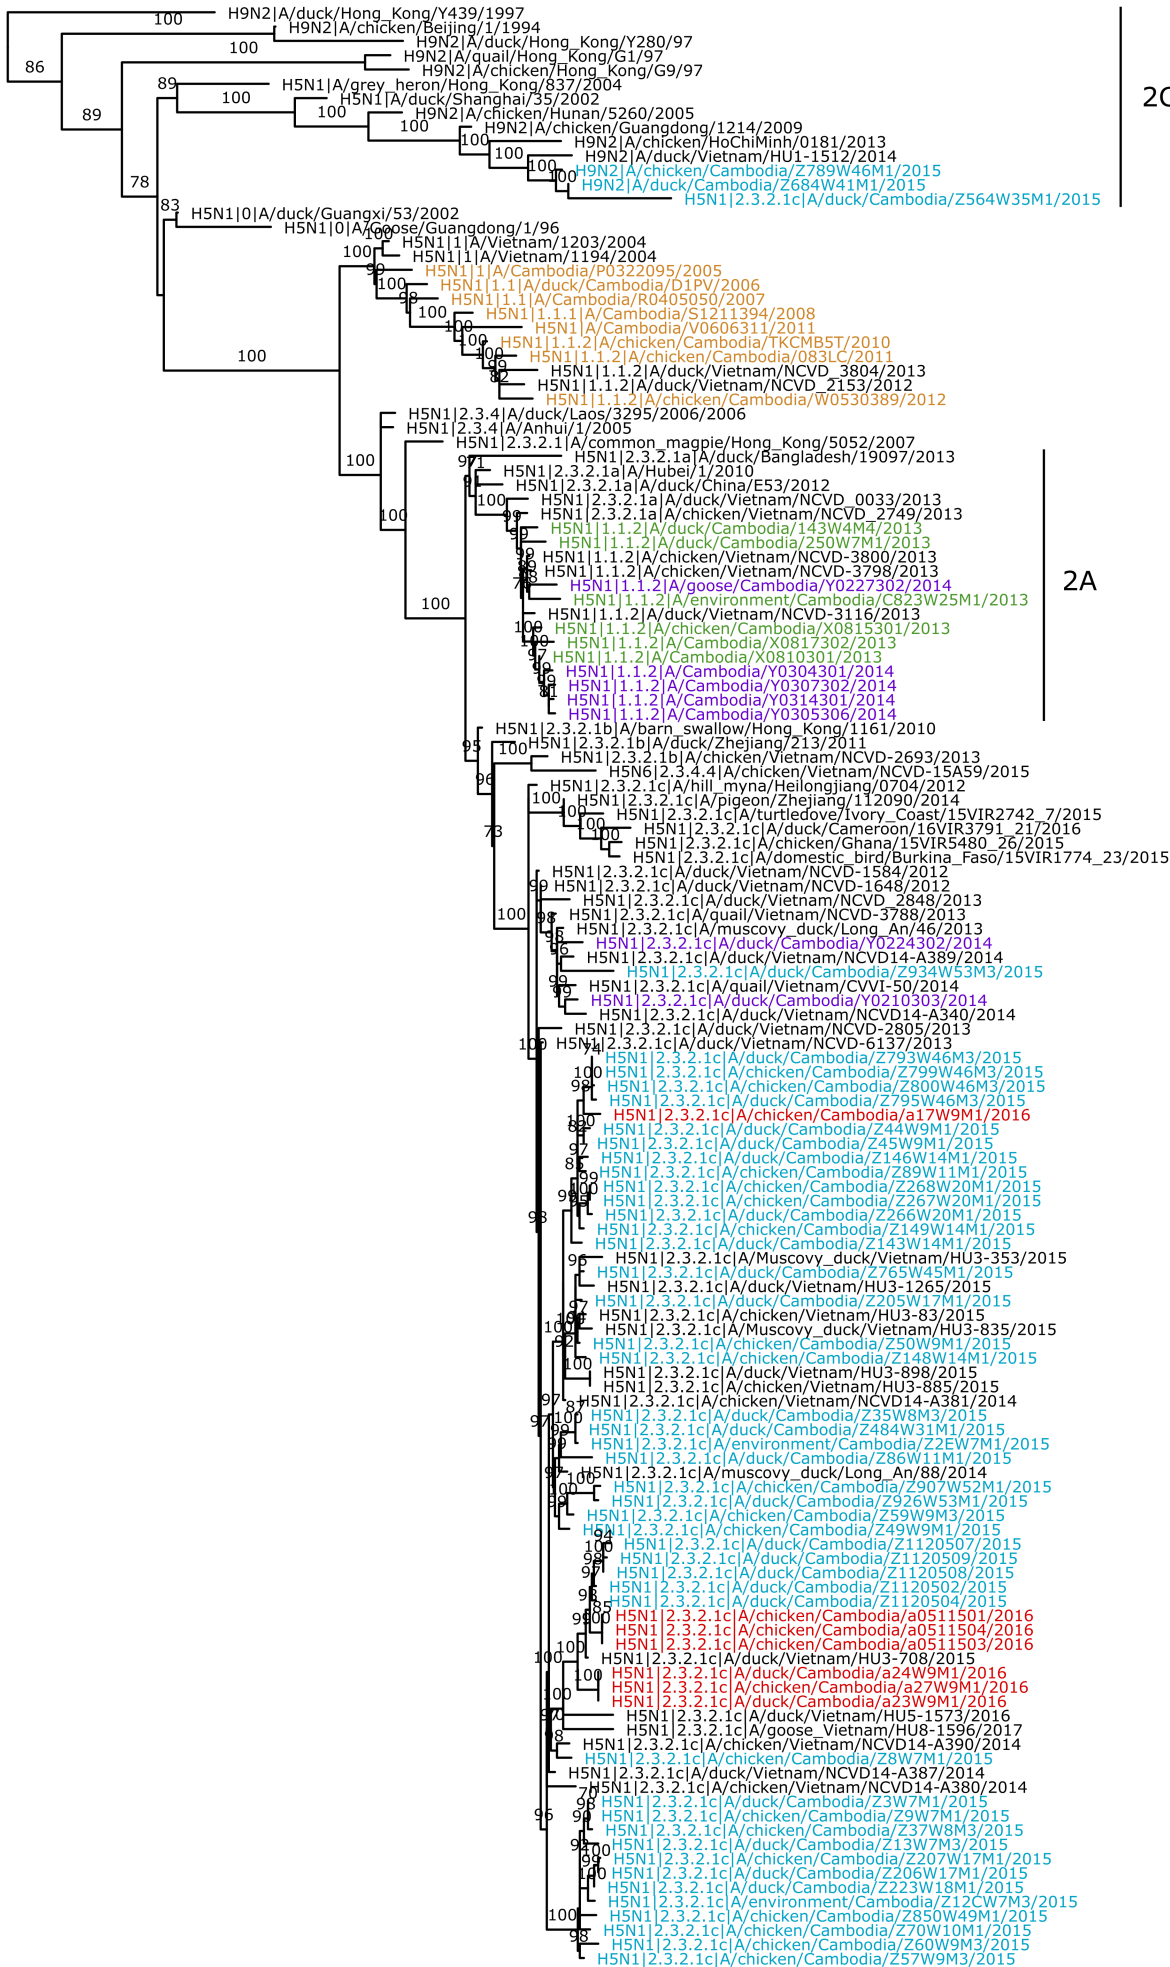

- 2005-2012
- 2013
- 2014
- 2015
- 2016

2C

2A

2B



S2d) PA

Key

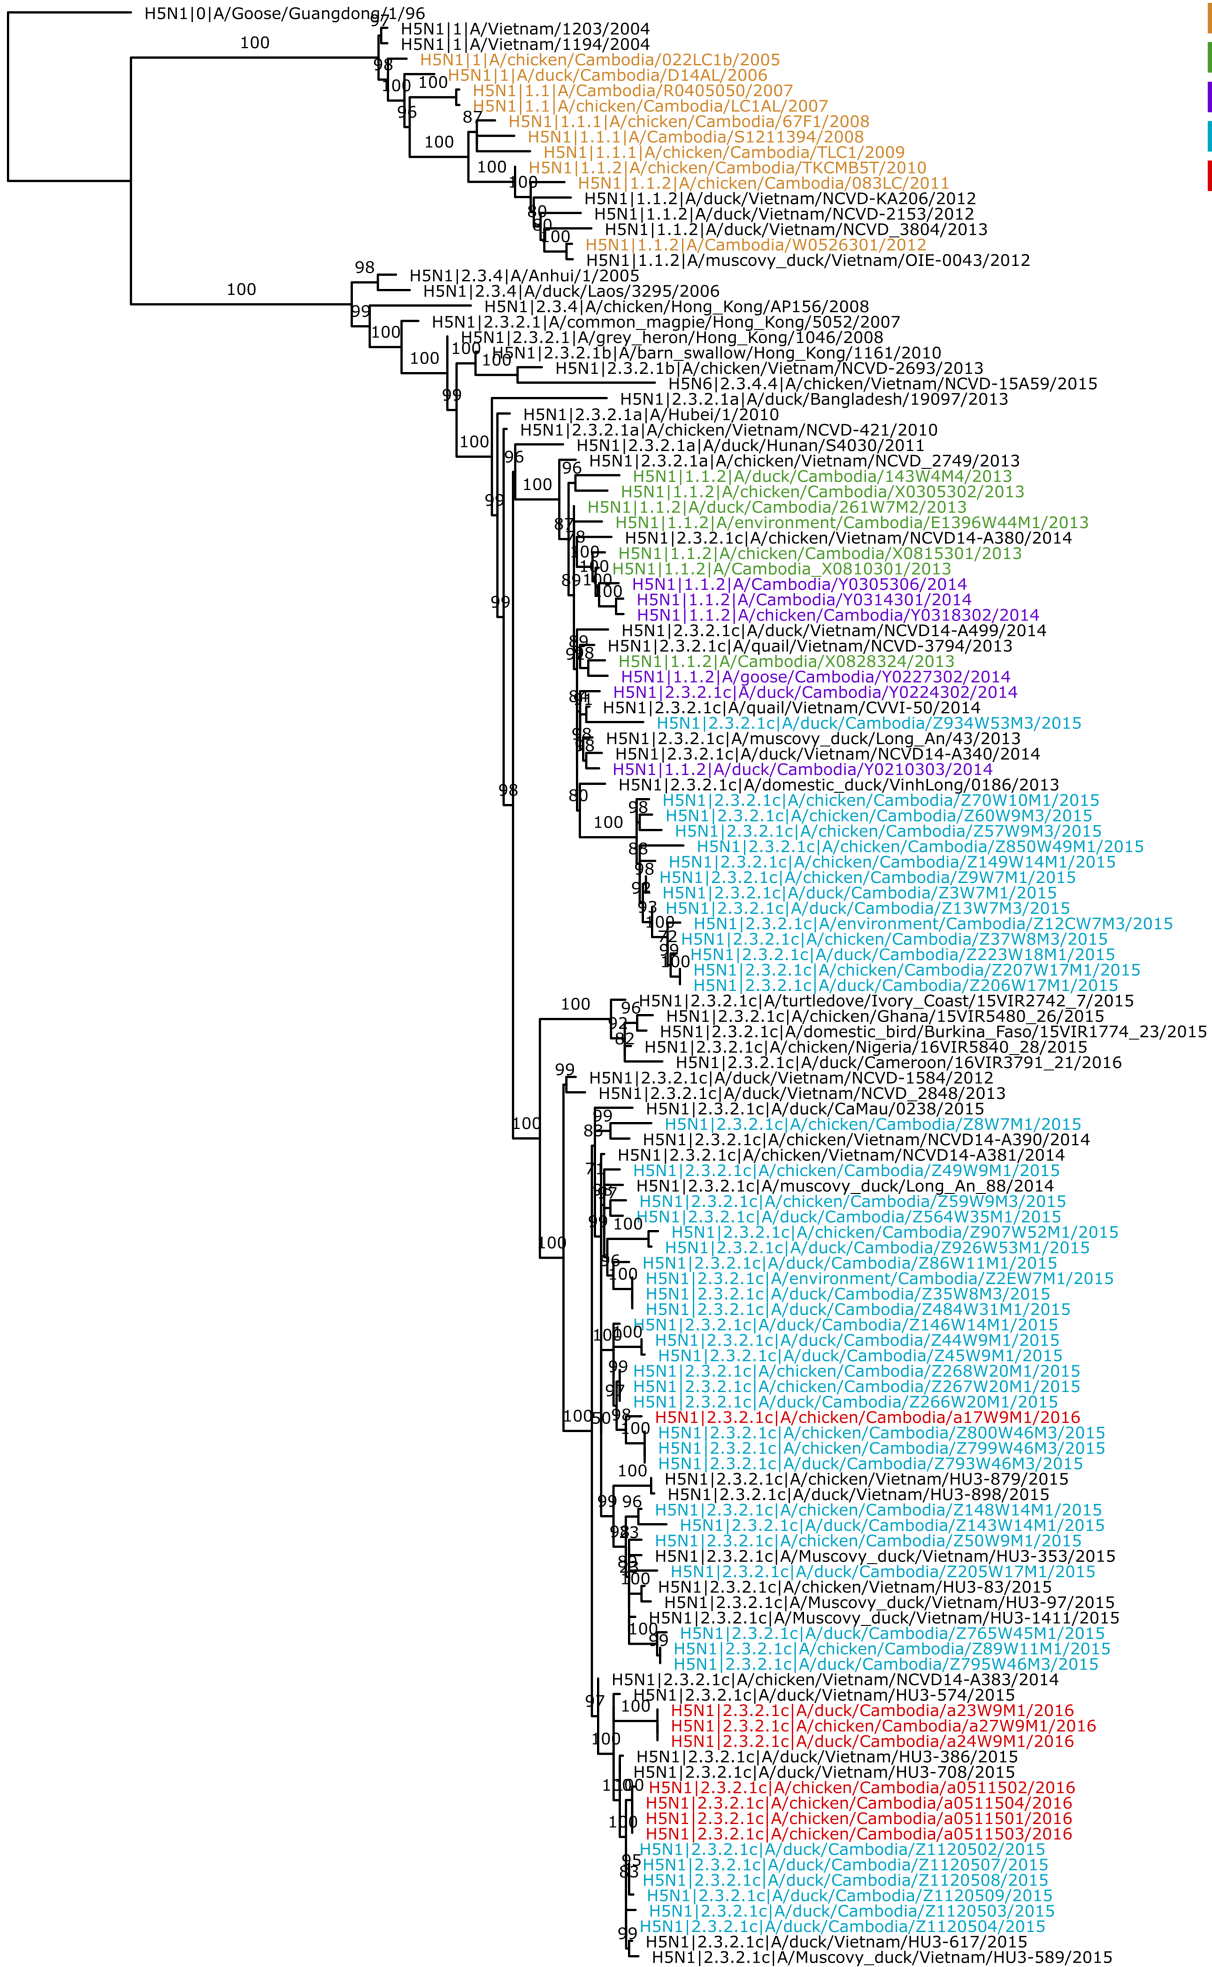

- 2005-2012
- 2013
- 2014
- 2015
- 2016

3A



- 2005-2012
- 2013
- 2014
- 2015
- 2016

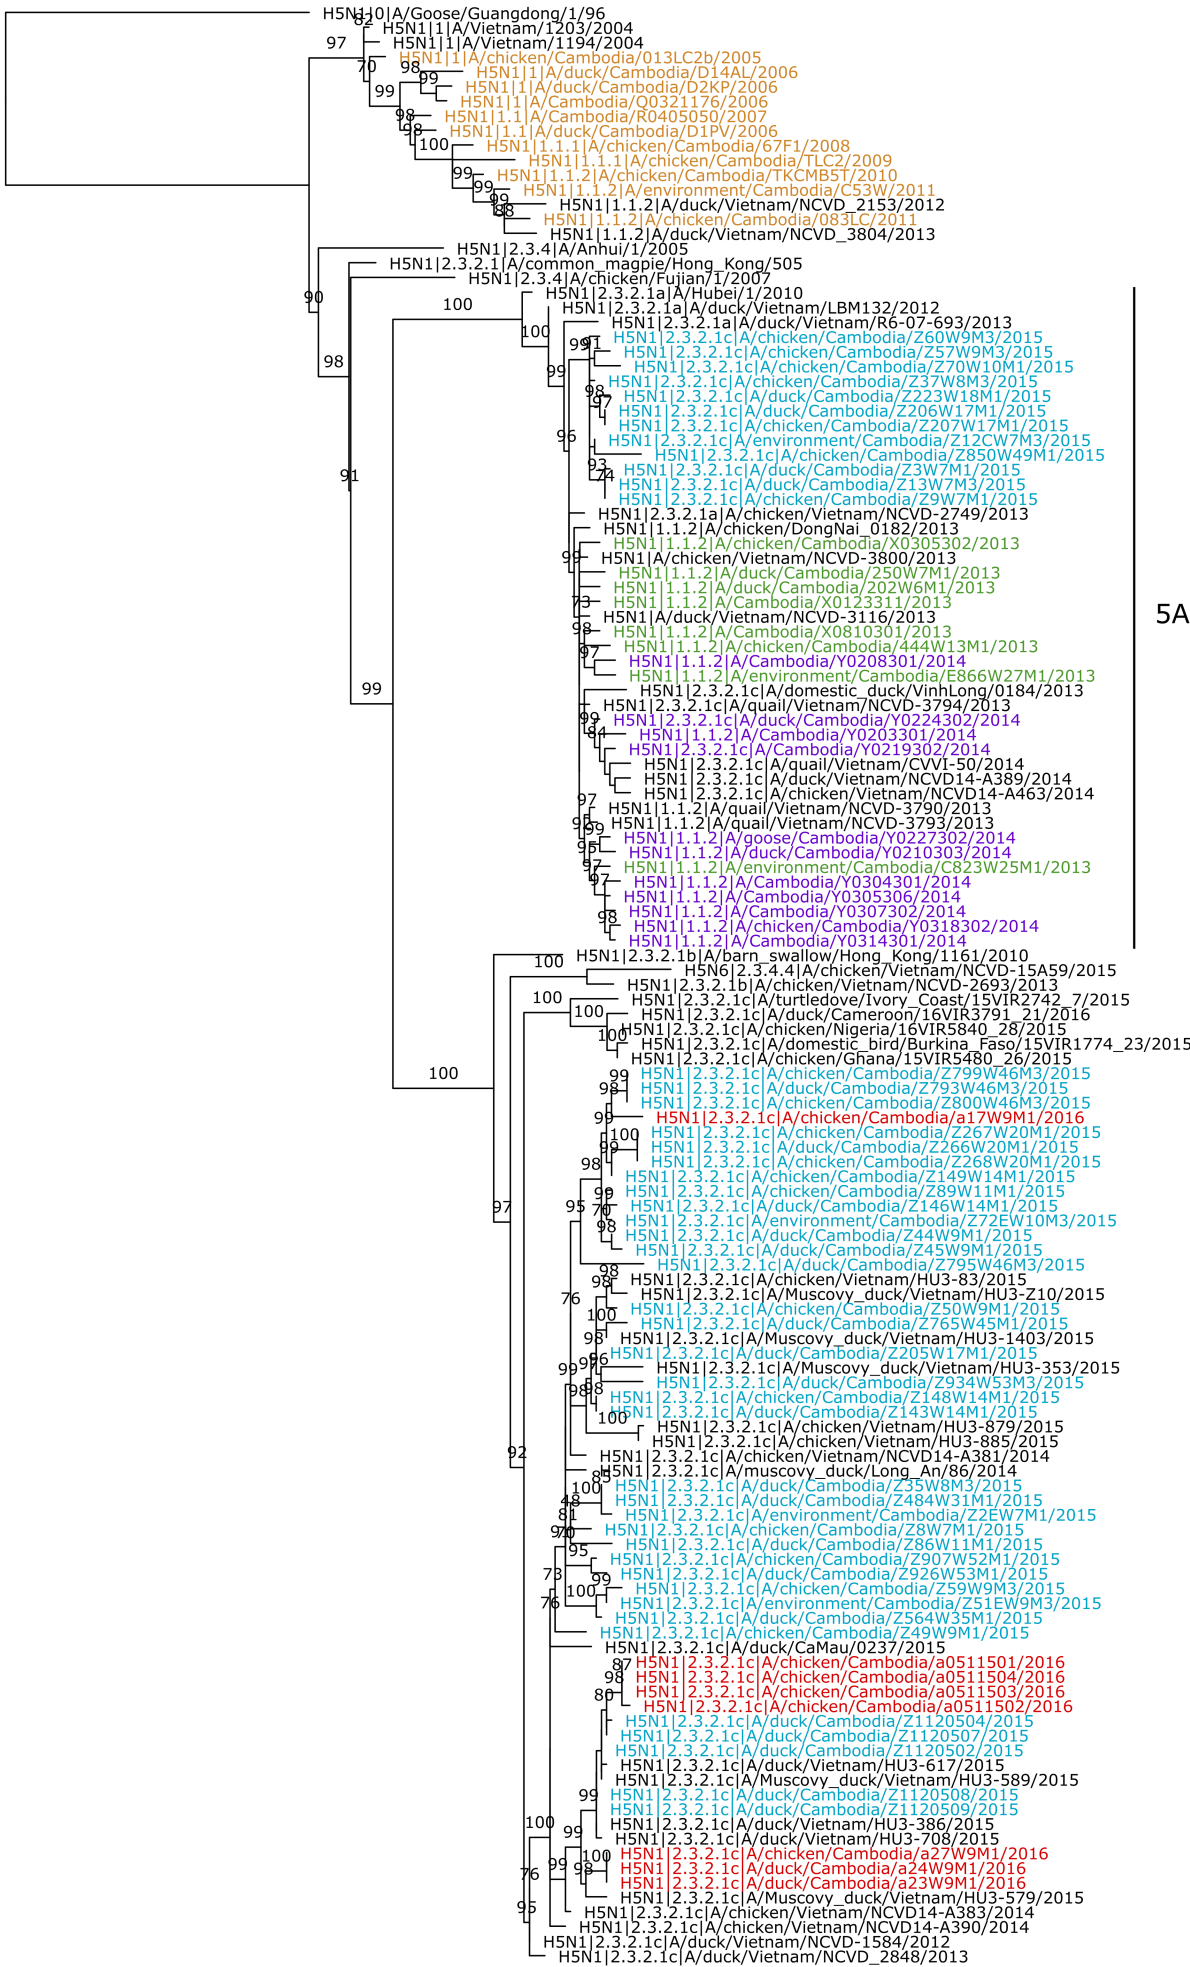

5A

5B

S2f) MP

Key

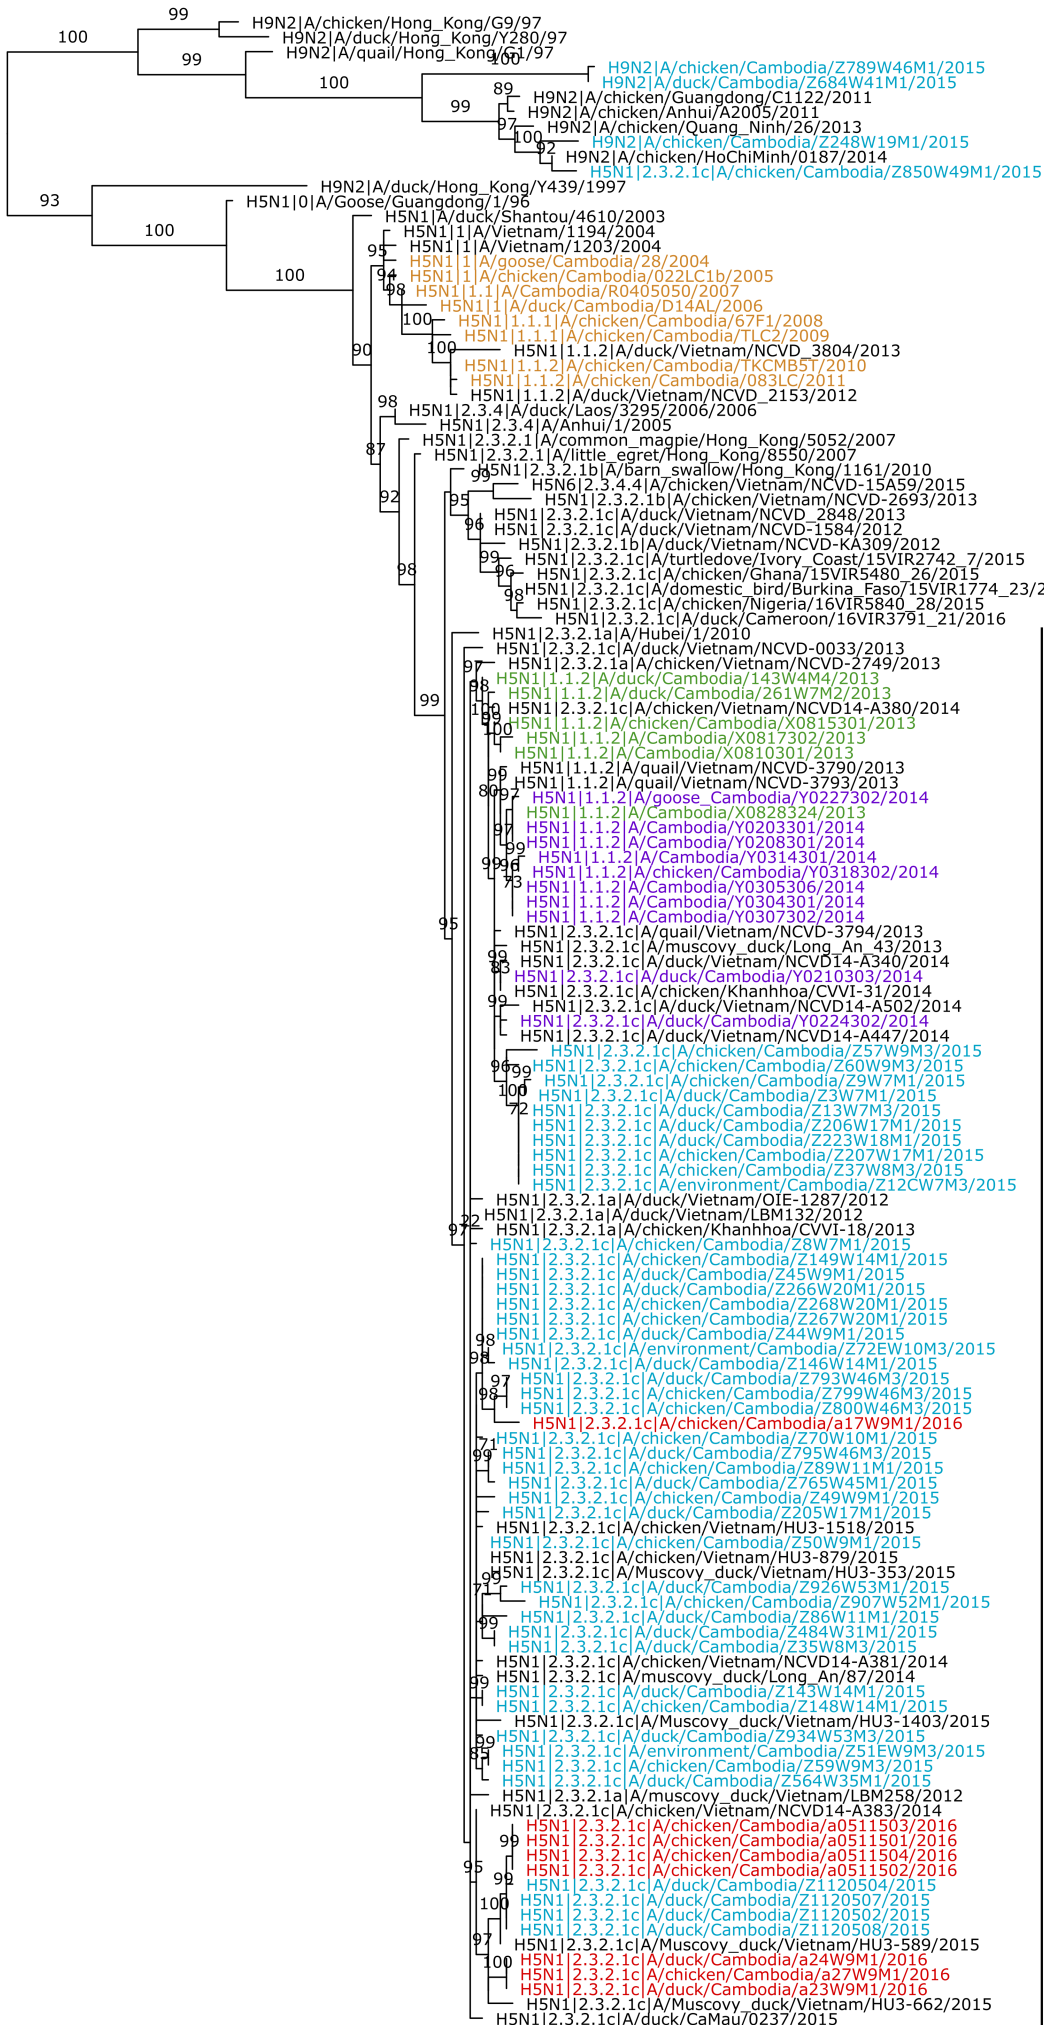

7C  
(H9 lineage)

- 2005-2012
- 2013
- 2014
- 2015
- 2016

7B

7A

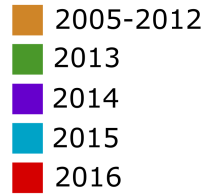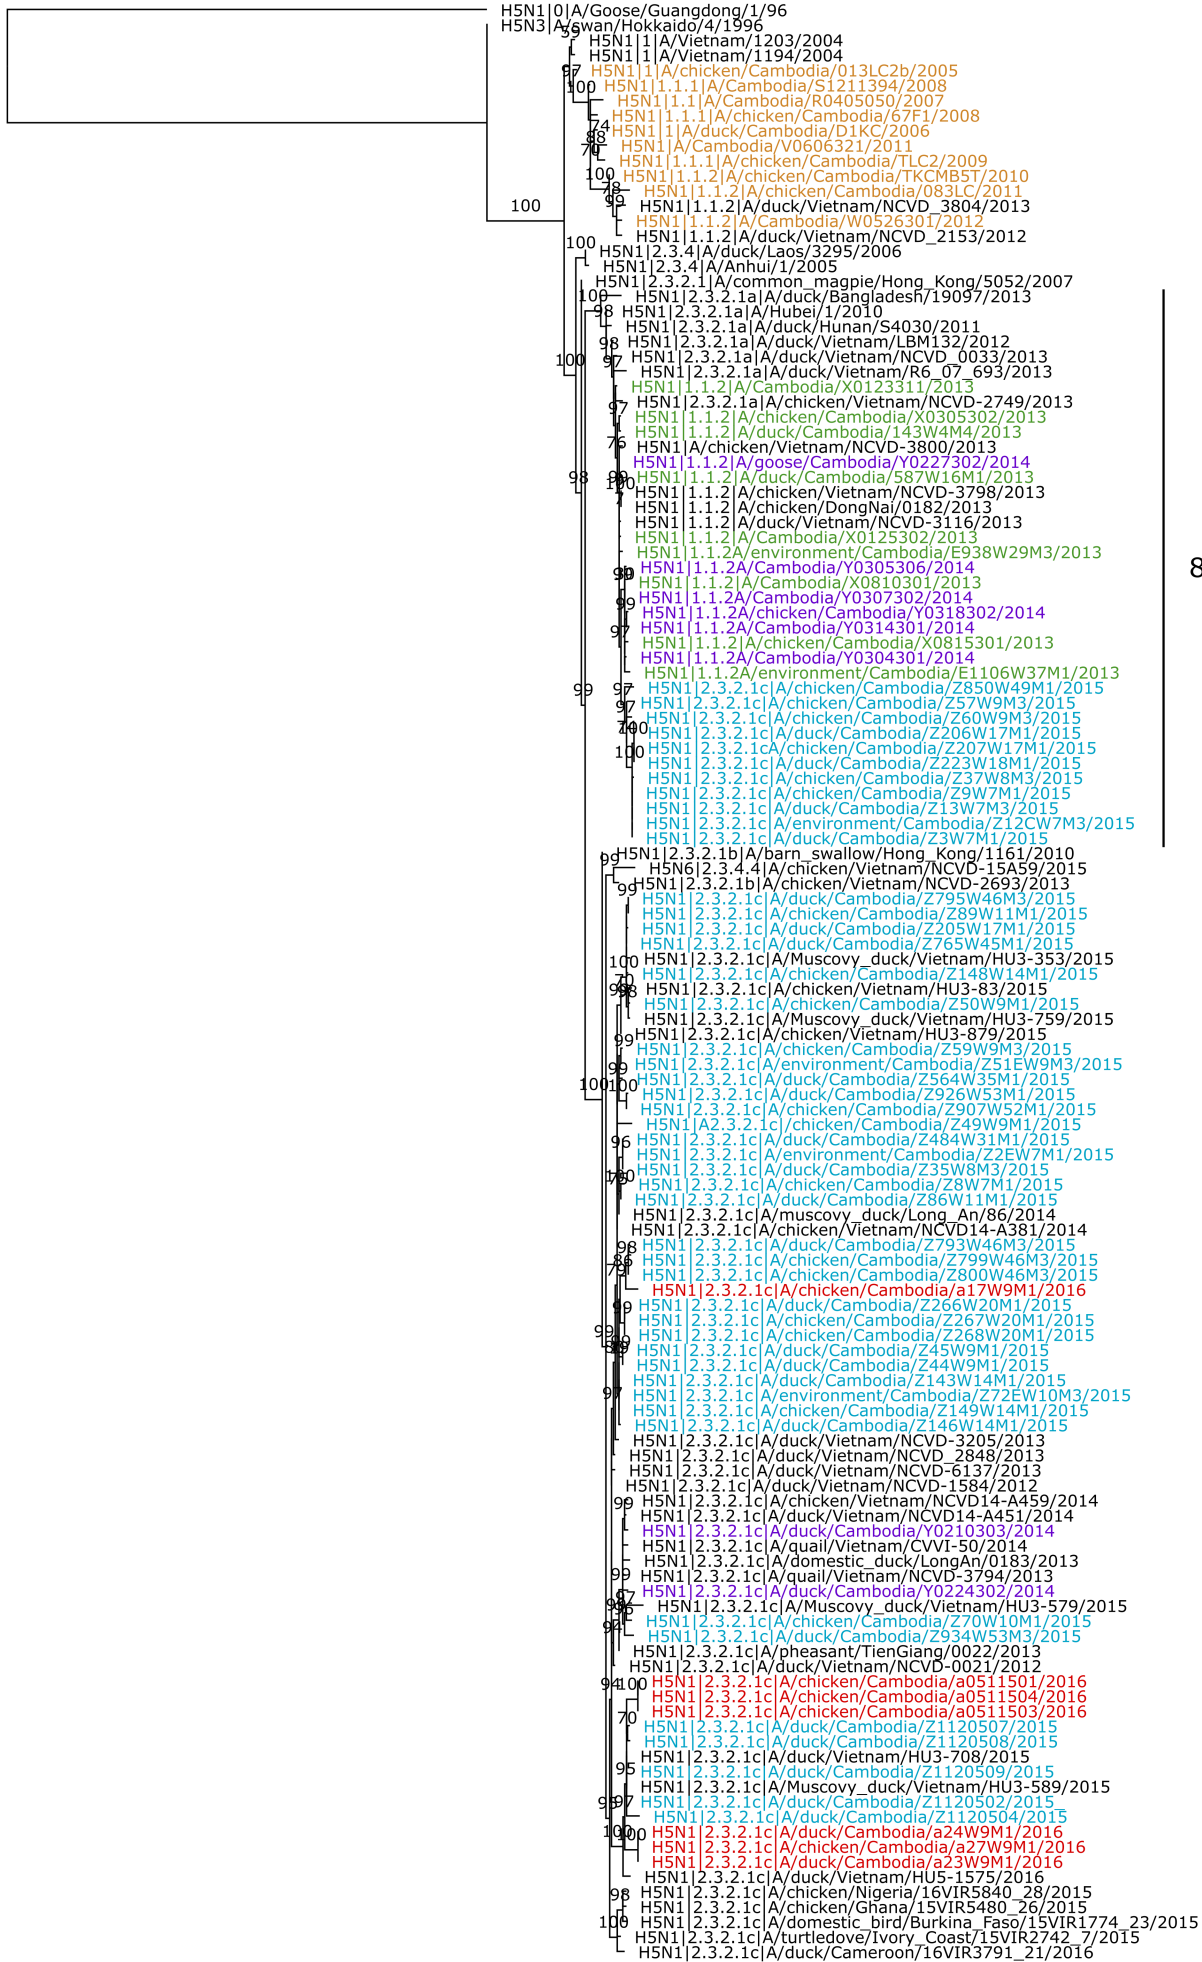

8A

8B
