# Supplementary material for: Diversity of A(H5N1) clade 2.3.2.1c avian influenza viruses with evidence of reassortment in Cambodia, 2014-2016
Source: PLoS One. 2019 Dec 9;14(12):e0226108. doi: 10.1371/journal.pone.0226108 (PMC6901219; doi:10.1371/journal.pone.0226108)
Supplement: S3 Table — (XLSX) [file pone.0226108.s005.xlsx]

## Sheet: S3. Selection pressure
			FELa			FUBARb			MEMEa			SLACa
Protein	No. Cambodian viruses	No. codon sites	Positive	Negative		Positive	Negative		Positive	Negative		Positive	Negative
PB2	77	759	2 (107, 339)	104		2 (107, 339)	219		2 (203, 339)	NA		0	45
PB1	70	757	0	97		2 (54, 739)	275		2 (54, 739)	NA		0	49
PA	75	716	0	85		0	213		2 (20, 357)	NA		0	35
HA	66	568	1 (169)	61		2 (169, 336)	100		1 (169)	NA		0	33
NP	104	498	0	95		0	187		1 (491)	NA		0	36
NA	67	449	1 (74)	40		1 (74)	40		0	NA		0	21
M1	90	252	0	28		0	24		0	NA		0	11
M2	90	97	0	2		1 (96)	1		1 (89)	NA		0	0
NS1	75	225	1 (27)	30		2 (132, 220)	15		0	NA		0	6
NS2	75	126	0	9		2 (19, 88)	6		0	NA		0	3
The number of statistically significant sites determined to be under positive or negative selection are shown for each method.
For positively selected sites the codon position is indicated in parenthesis and codons identified by more than one method are indicated in bold.
a MEME, FEL and SLAC p-value threshold of <0.1
b FUBAR posterior probability ≥0.9
